# Supplementary material for: Enhancement of photocurrent generation and open circuit voltage in dye-sensitized solar cells using Li+ trapping species in the gel electrolyte
Source: Royal Society of Chemistry journal article supplement (doi:10.1039/b717278h), 2008-01-01
Supplement: b717278h.pdf [file b717278h.pdf]

## *Supplementary Information*

### **Enhancement of photocurrent generation in dye-sensitized solar cells using polymeric electrolytes**

João Eduardo Benedetti, Marco Aurelio de Paoli, and Ana Flávia Nogueira

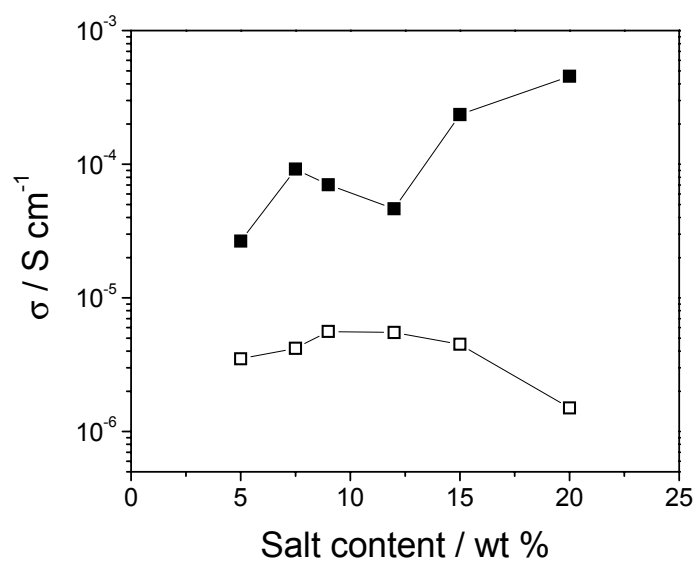

Figure S1. Effect of salt concentration on conductivity for polymer electrolytes based on a similar polymer, poly(ethylene oxide-co-epichlorohydrin), I<sub>2</sub> and: (-■-) LiI + 50 wt % GBL and (-□-) LiI, without GBL

This figure exhibits the plot of ionic conductivity as a function of LiI concentration for a “normal” polymer electrolyte (salt and polymer only) and for a system containing GBL.
